# Supplementary material for: Fabrication and in vitro investigation of hyperbranched poly-lysine-grafted warp knitted polypropylene sling for potential treatment of stress urinary incontinence
Source: Royal Society of Chemistry journal article supplement (doi:10.1039/d3bm00943b), 2023-01-01
Supplement: d3bm00943b1.pdf [file d3bm00943b1.pdf]

# **Fabrication and In Vitro Investigation of Hyperbranched Poly-Lysine-Grafted Warp Knitted Polypropylene Sling for Potential Treatment of Stress Urinary Incontinence**

## **Supporting Information**

Shuying Zhao<sup>a,b</sup>, Meiqi Fang<sup>a,b</sup>, Yan Li<sup>\*a,b</sup>, Fujun Wang<sup>a,b</sup>, Hao Li<sup>c</sup>, and Lu Wang<sup>a,b</sup>

<sup>a</sup> Key Laboratory of Textile Science & Technology, Ministry of Education, College of Textiles, Donghua University, Shanghai, China.

<sup>b</sup> Key Laboratory of Textile Industry for Biomedical Textile Materials and Technology, Donghua University, Shanghai, China.

<sup>c</sup> Shanghai Hongyu Medical Technology Co., Ltd. Shanghai, China.

### **Corresponding Author**

\* E-mail addresses: [yanli@dhu.edu.cn](mailto:yanli@dhu.edu.cn)

Table S1. The surface elemental composition of samples

| <b>Sample</b> | <b>C(%)</b> | <b>N(%)</b> | <b>O(%)</b> | <b>O/N(%)</b> | <b>C/N(%)</b> |
|---------------|-------------|-------------|-------------|---------------|---------------|
| PP            | 82.02       | 0           | 17.98       | /             | /             |
| PNE-PP        | 69.24       | 6.29        | 24.46       | 3.89          | 11.01         |
| 20HBPL-PNE-PP | 70.06       | 11.13       | 18.81       | 1.69          | 6.29          |

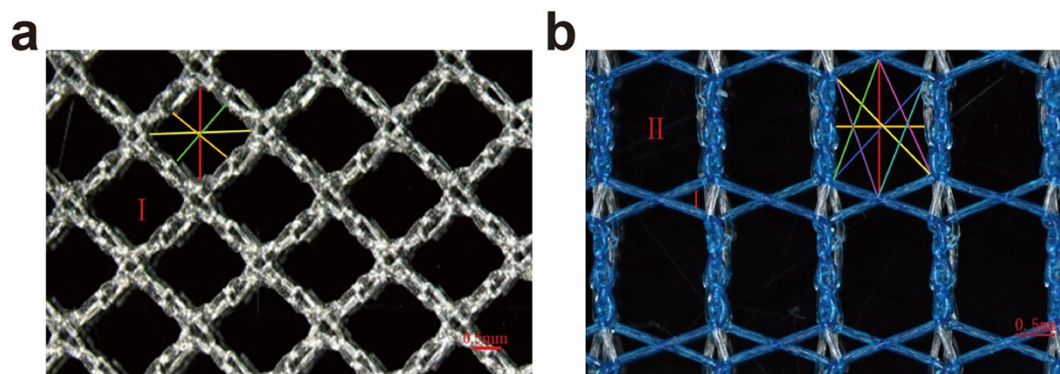

**Fig. S1.** Pore measurement of PI 38 (a) and PP (b).

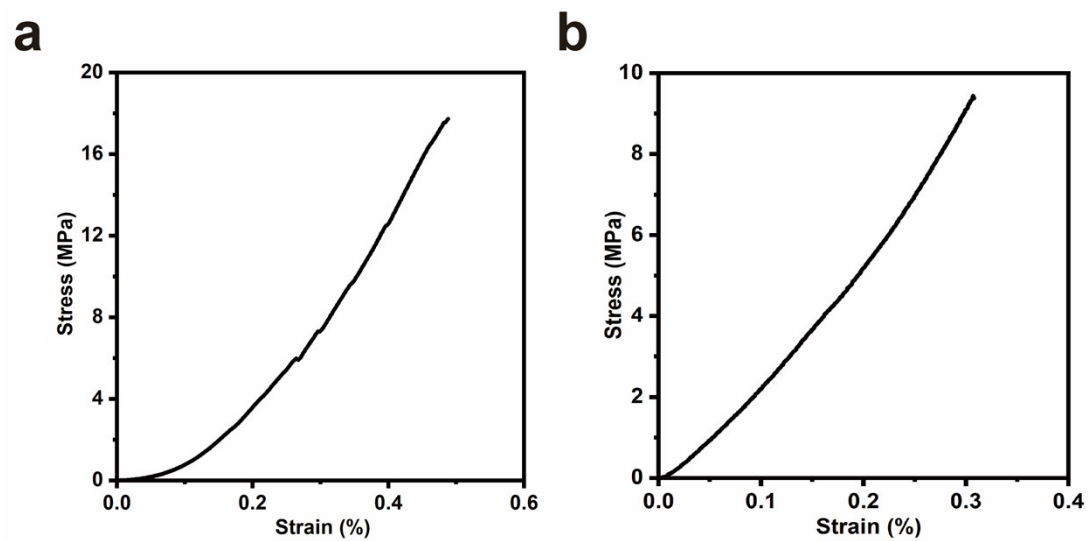

**Fig. S2.** Stress-strain curves of PI 38 (a) and PP (b)

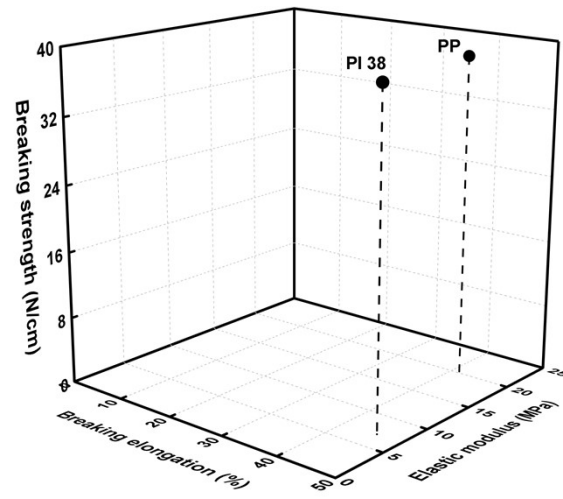

**Fig. S3.** Uniaxial tensile properties of slings.

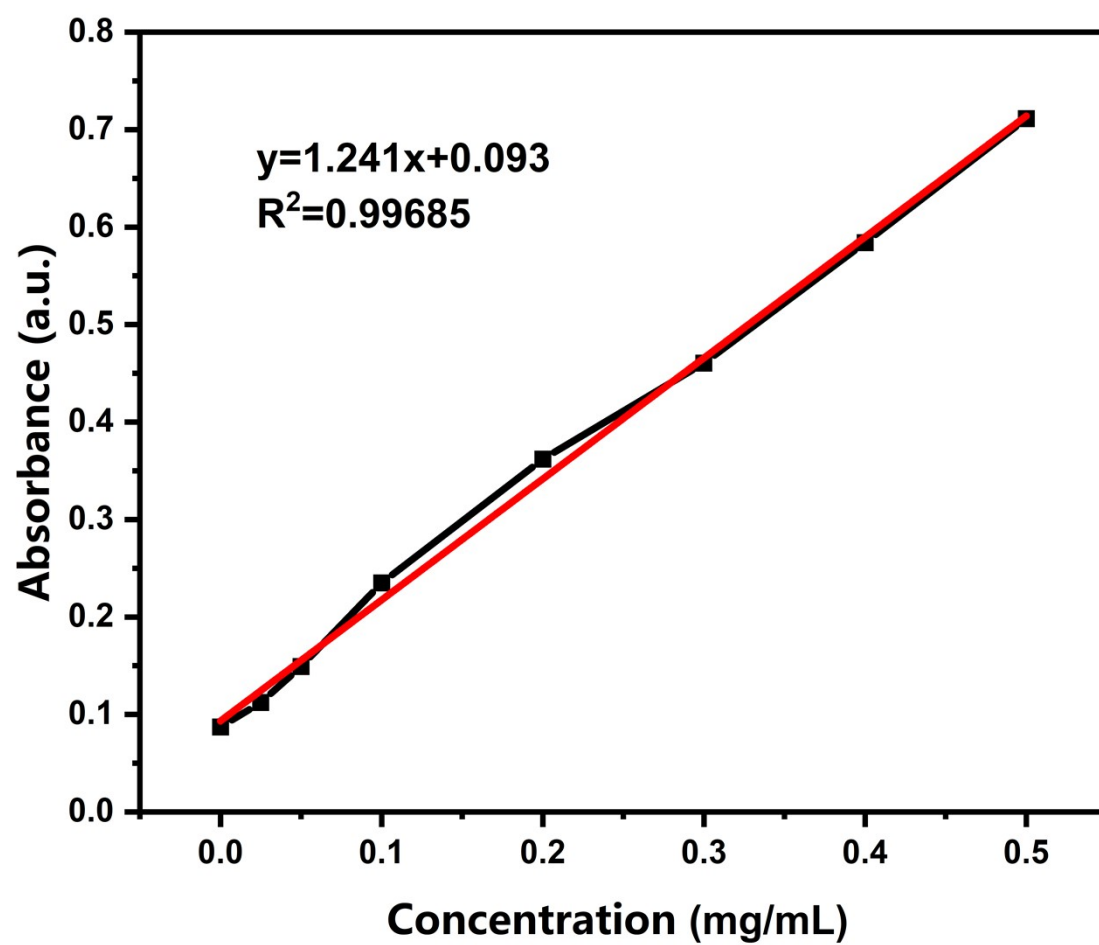

**Fig. S4.** Standard curve of BSA

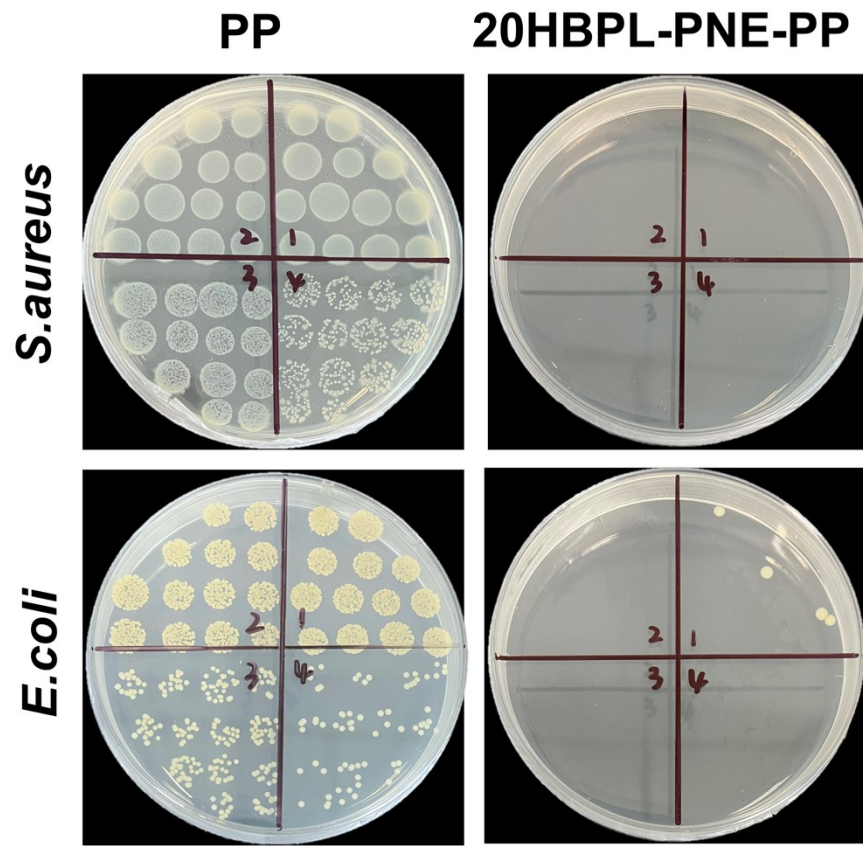

**Fig. S5.** Antibacterial properties of slings after fixed load stretching

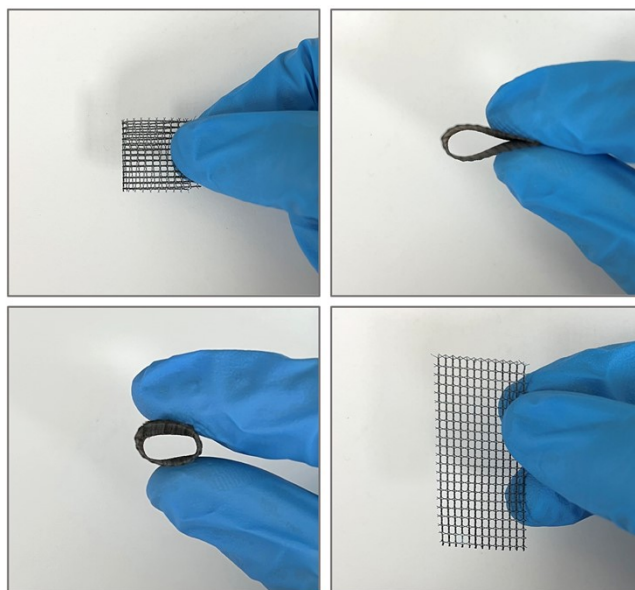

**Fig. S6.** Bending of the sling after coating.
